# Supplementary material
Source: ML conference proceedings conference paper supplement (https://openreview.net/forum?id=vd4eNAdtO6)

QSM (before fix) QSM (after fix)

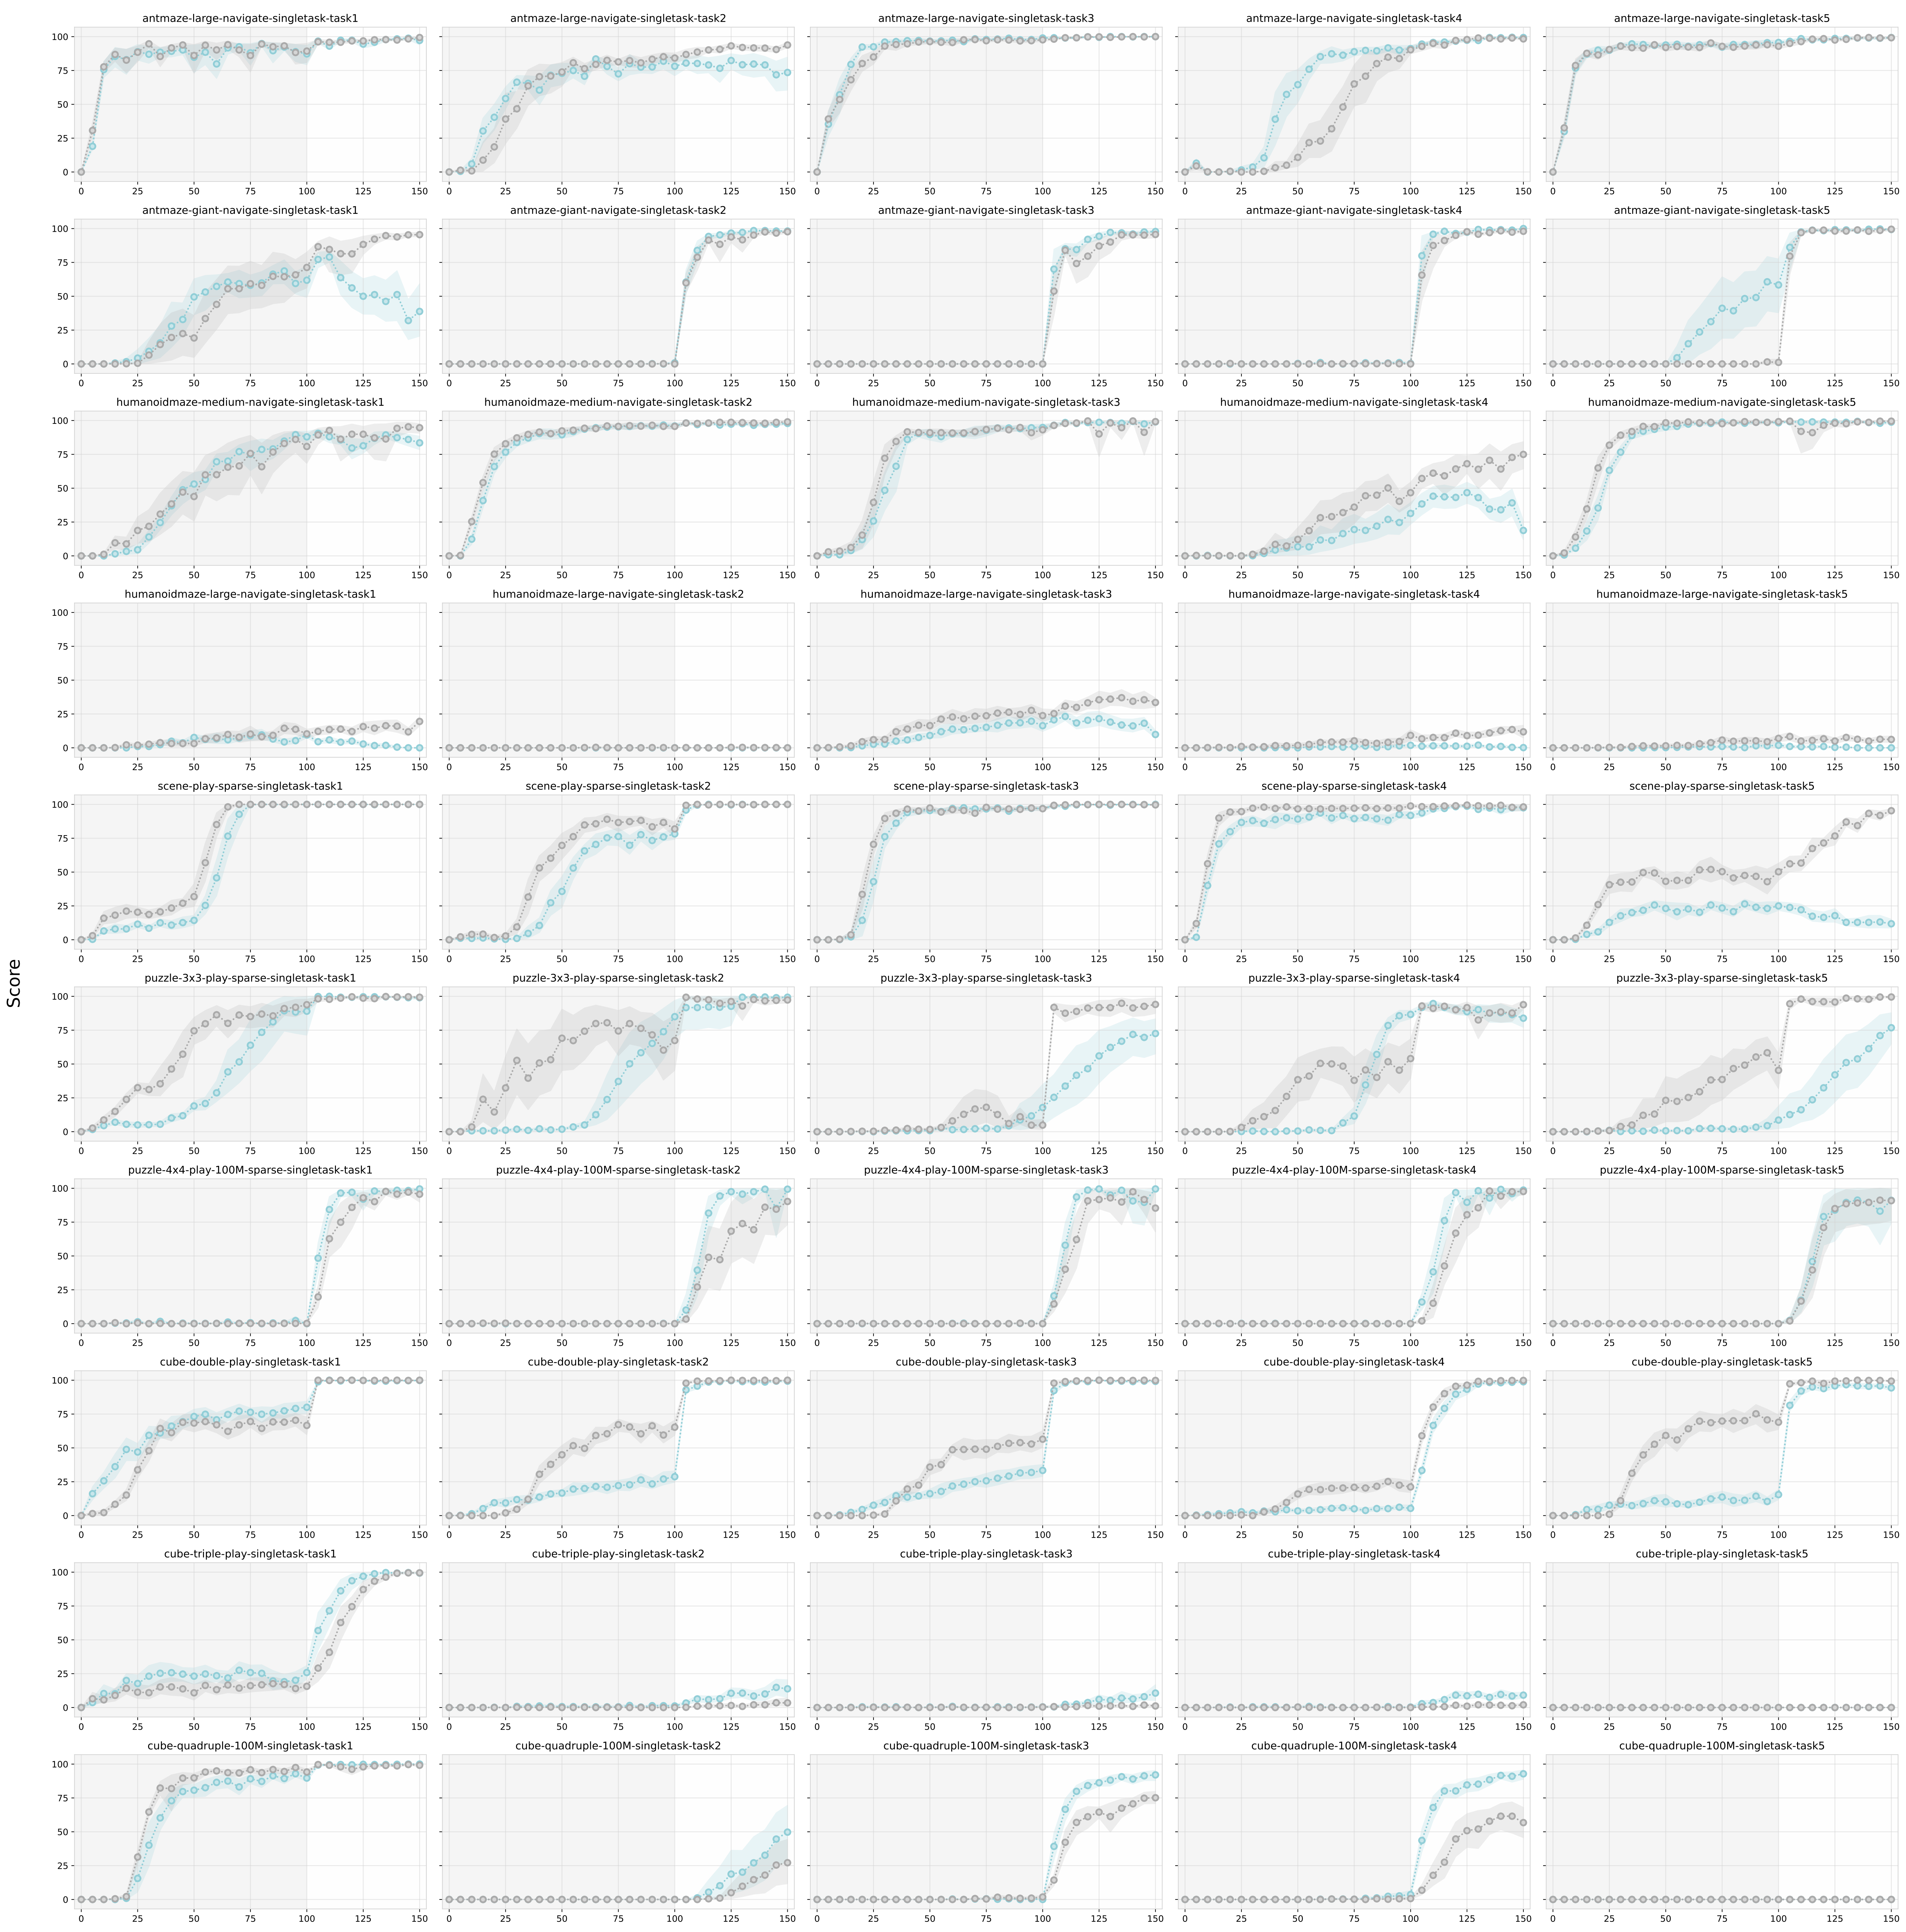

Training Steps ( $\times 10^4$ )

Supplement: supplementary_material [file qsm-fix-ablation.pdf › supp/assets/qsm-fix-ablation.pdf]
